# Supplementary material
Source: PubMed Central journal article supplement (PMC9718049)
Supplement: CJN.02520322-s0001.pdf [file CJN.02520322-s0001.pdf]

## **Safety and Efficacy of Belimumab in Patients with Lupus Nephritis: Open-label Extension of BLISS-LN Study**

**Running head:** Open-label study of belimumab in lupus nephritis

Richard Furie<sup>1</sup>, Brad H Rovin<sup>2</sup>, Frédéric Houssiau<sup>3</sup>, Gabriel Contreras<sup>4</sup>, YK Onno Teng<sup>5</sup>, Paula Curtis<sup>6</sup>, Yulia Green<sup>6</sup>, Mohamed Okily<sup>6</sup>, Anuradha Madan<sup>7\*</sup>, David A. Roth<sup>7</sup>

<sup>1</sup>Division of Rheumatology, Northwell Health, Great Neck, NY, USA; <sup>2</sup>Division of Nephrology, The Ohio State University, Columbus, OH, USA; <sup>3</sup>Pôle de Pathologies Rhumatismales Inflammatoires et Systémiques, Institut de Recherche Expérimentale et Clinique, Université Catholique de Louvain and Service de Rhumatologie, Cliniques Universitaires Saint-Luc, Brussels, Belgium; <sup>4</sup>Division of Nephrology, Division of Hypertension, Department of Medicine, University of Miami Miller School of Medicine, Miami, FL, USA; <sup>5</sup>Expert Center for Lupus-, Vasculitis- and Complement-mediated Systemic Diseases, Department of Internal Medicine – section Nephrology, Leiden University Medical Center, Leiden, The Netherlands; <sup>6</sup>GSK, Brentford, Middlesex, UK; <sup>7</sup>GSK, Collegeville, PA, USA

\*At the time of the study

### **Corresponding author**

**Name:** Richard Furie

**Address:** Division of Rheumatology, Northwell Health, Donald and Barbara Zucker School of Medicine, 865 Northwell Boulevard, Suite 302, Great Neck, New York 11021, NY, USA

**Tel:** + 1 516-708-2550

**Email:** [RFurie@northwell.edu](mailto:RFurie@northwell.edu)

## Supplemental material

### Supplemental material table of contents

|                                                                                                                                                                                                                      |
|----------------------------------------------------------------------------------------------------------------------------------------------------------------------------------------------------------------------|
| Withdrawal criteria                                                                                                                                                                                                  |
| <b>Supplemental Table 1. Double-blind phase baseline characteristics for patients enrolled in the open-label phase and the overall population of the double-blind phase (modified intention-to-treat population)</b> |
| Treatment failures and discontinuations among non-responders for Primary Efficacy Renal Response and Complete Renal Response (based on the double-blind phase criteria; <i>post hoc</i> analyses)                    |

#### Withdrawal criteria

Patients were withdrawn from the study if any of the following criteria were met:

- Missed 3 or more consecutive doses of study treatment
- Prohibited concurrent medication (live vaccine, biologics, and other investigational drugs)
- Prohibited therapy (anti-tumor necrosis factor therapy, intravenous immunoglobulin G [IgG], plasmapheresis)
- Unacceptable toxicity
- Pregnancy
- Withdrew consent
- Patients positive for anti-hepatitis B core antigen at screening who developed elevated liver function tests  $>2.5 \times$  upper limit of normal during the study, followed by a hepatitis B virus DNA test that showed detectable viral load

Patients who entered the open-label phase and withdrew early returned for an exit visit approximately 4 weeks after their last dose of study treatment, as well as a follow-up visit approximately 8 weeks after the last dose of study treatment.

**Supplemental Table 1. Double-blind phase baseline characteristics for patients enrolled in the open-label phase and the overall population of the double-blind phase (modified intention-to-treat populations)**

|                                     | Open-label phase population<br>(N=254)                  |                                                           | Double-blind phase overall population<br>(N=446) |                                              |
|-------------------------------------|---------------------------------------------------------|-----------------------------------------------------------|--------------------------------------------------|----------------------------------------------|
|                                     | Placebo-to-belimumab<br>Intravenous 10 mg/kg<br>(N=122) | Belimumab-to-belimumab<br>Intravenous 10 mg/kg<br>(N=132) | Placebo<br>(N=223)                               | Belimumab<br>Intravenous 10 mg/kg<br>(N=223) |
| <b>Race, n (%)</b>                  |                                                         |                                                           |                                                  |                                              |
| American Indian or Alaska Native    | 3 (3)                                                   | 1 (0.8)                                                   | 6 (3)                                            | 4 (2)                                        |
| Asian                               | 67 (55)                                                 | 71 (54)                                                   | 109 (49)                                         | 114 (51)                                     |
| Black African/American Ancestry     | 13 (11)                                                 | 12 (9)                                                    | 31 (14)                                          | 30 (13)                                      |
| White/Caucasian                     | 38 (31)                                                 | 47 (36)                                                   | 75 (34)                                          | 73 (33)                                      |
| Mixed race                          | 1 (0.8)                                                 | 1 (0.8)                                                   | 2 (0.9)                                          | 2 (0.9)                                      |
| <b>Age (years), mean (SD)</b>       | 34 (10)                                                 | 34 (10)                                                   | 33 (11)                                          | 34 (11)                                      |
| <b>Female, n (%)</b>                | 110 (90)                                                | 118 (89)                                                  | 196 (88)                                         | 197 (88)                                     |
| <b>Lupus nephritis class, n (%)</b> |                                                         |                                                           |                                                  |                                              |
| Class III or IV                     | 70 (57)                                                 | 78 (59)                                                   | 132 (59)                                         | 126 (56)                                     |
| Class III + V or Class IV + V       | 31 (25)                                                 | 36 (27)                                                   | 55 (25)                                          | 61 (27)                                      |

|                                                       |                |                |                |                |
|-------------------------------------------------------|----------------|----------------|----------------|----------------|
| Class V                                               | 21 (17)        | 18 (14)        | 36 (16)        | 36 (16)        |
| <b>UPCR (g/g), median (IQR)</b>                       | 2.8 (1.4, 4.7) | 2.0 (0.9, 4.0) | 2.5 (1.4, 4.8) | 2.6 (1.1, 4.4) |
| <b>UPCR category (g/g), n (%)</b>                     |                |                |                |                |
| <0.5                                                  | 5 (4)          | 7 (5)          | 8 (4)          | 9 (4)          |
| ≤0.7                                                  | 9 (7)          | 19 (14)        | 15 (7)         | 22 (10)        |
| 0.5–<3                                                | 62 (51)        | 77 (58)        | 123 (55)       | 123 (55)       |
| ≥3                                                    | 55 (45)        | 48 (36)        | 92 (41)        | 91 (41)        |
| <b>eGFR (ml/min/1.73 m<sup>2</sup>), median (IQR)</b> | 98 (67, 122)   | 99 (74, 120)   | 98 (67, 127)   | 99 (72, 124)   |
| <b>SLEDAI-S2K score, median (IQR)</b>                 | 12 (8, 16)*    | 12 (8, 15)     | 12 (8, 16)     | 12 (8, 16)     |
| <b>SLEDAI-S2K category, n (%)</b>                     |                |                |                |                |
| <8                                                    | 22 (18)        | 26 (20)        | 36 (16)        | 37 (17)        |
| 8–<12                                                 | 29 (24)        | 33 (25)        | 60 (27)        | 55 (25)        |
| 12–<16                                                | 37 (30)        | 40 (30)        | 59 (27)        | 63 (28)        |
| ≥16                                                   | 33 (27)        | 33 (25)        | 67 (30)        | 68 (31)        |
| Missing                                               | 1 (0.8)        | 0 (0)          | 1 (0.4)        | 0 (0)          |

\*N=121.

eGFR, estimated glomerular filtration rate; IQR, interquartile range; SD, standard deviation; SLE, systemic lupus erythematosus; SLEDAI-S2K, SLE Disease

Activity Index-2000; UPCR, urine protein:creatinine ratio

**Treatment failures and discontinuations among non-responders for primary efficacy renal response and complete renal response (based on the double-blind phase criteria; *post hoc* analyses)**

The observed decrease in primary efficacy renal response and complete renal response rates at open-label Week 28 in the belimumab-to-belimumab group was mainly due to discontinuations (n=8) or intake of concomitant medications (n=9) that were allowed during the open-label phase but were counted as treatment failures for the statistical analysis. Of the 9 patients who were treatment failures due to prohibited medications, 1 patient took prednisone for non-SLE reason of excemal dermatitis as well as for a kidney-related reason, 3 patients took prednisone >10 mg after the open-label baseline for non-kidney SLE reasons of arthritis and rash flare, and 5 patients took prednisone, IgG, hydroxychloroquine or switched to subcutaneous belimumab due to non-SLE reasons of upper respiratory infections, allergy prevention, immuno-enhancement for a serious AE, and maintenance medication. In the placebo-to-belimumab group, one patient took concomitant medication of prednisone for non-kidney reasons of bronchitis and swelling of hands, which was counted as treatment failure for the statistical analysis.

Of the 8 patients who discontinued from the study in the belimumab-to-belimumab group, 4 were due to AEs (peripheral edema, sinusitis, cellulitis, skin ulcer, myringitis, pharyngitis, disseminated tuberculosis) and 4 were due to other reasons (lost to follow-up, protocol deviation, consent withdrawal). In the placebo-to-belimumab group, there was one patient who discontinued from the study; the patient died due to multiple organ dysfunction syndrome, sepsis secondary to nosocomial pneumonia, and chronic kidney disease.
